# Supplementary material for: Cytosolic THUMPD1 promotes breast cancer cells invasion and metastasis via the AKT-GSK3-Snail pathway
Source: PubMed Central journal article supplement (PMC5355103; doi:10.18632/oncotarget.14528), 2017-01-05
Supplement: oncotarget-08-13357-s001.pdf [file oncotarget-08-13357-s001.pdf]

## Cytosolic THUMPD1 promotes breast cancer cells invasion and metastasis via the AKT-GSK3-Snail pathway

### Supplementary Materials

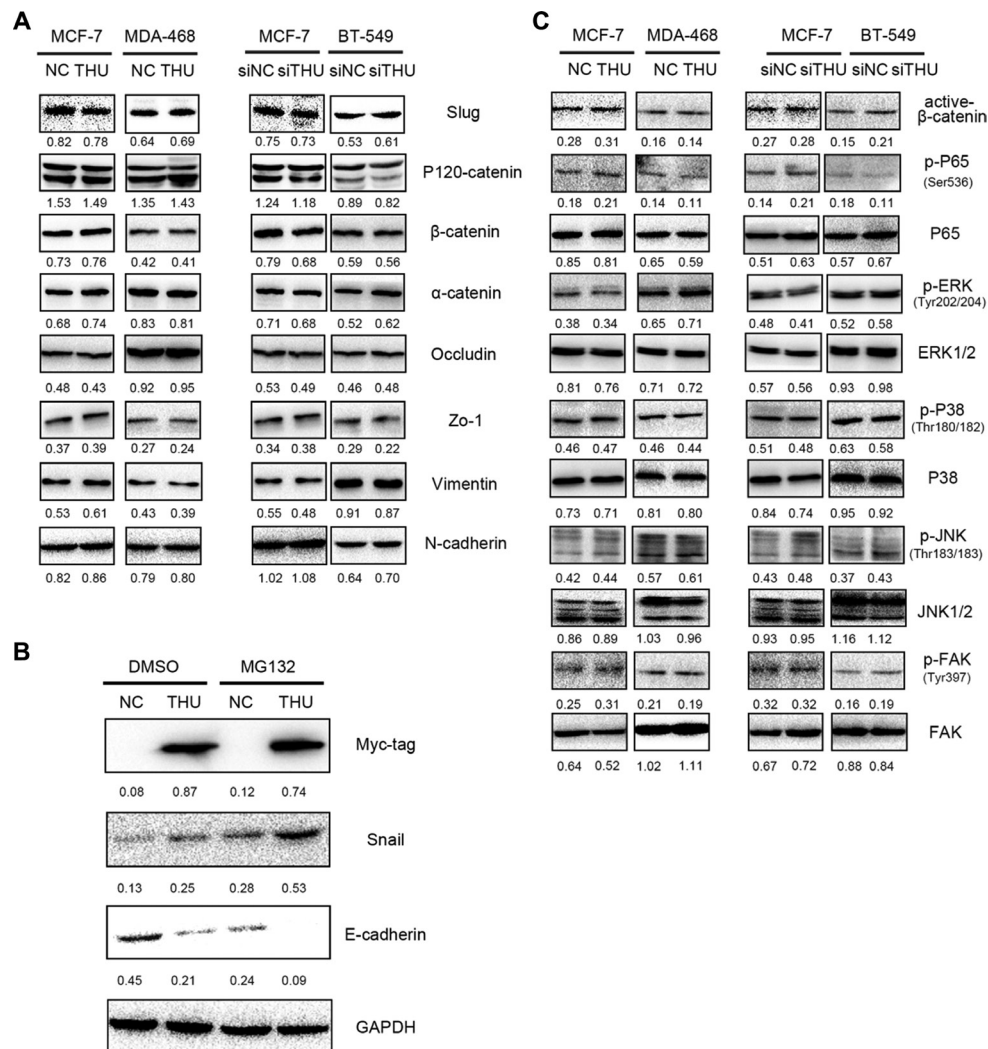

**Supplementary Figure 1: Thumpd1 decreased E-cadherin via AKT-GSK3 $\beta$ -Snail pathway.** (A) Overexpressing THUMPD1 did not alter the expression of Slug, P120-catenin,  $\beta$ -catenin,  $\alpha$ -catenin, Occludin, Zo-1, Vimentin and N-cadherin, the levels of these proteins showed no significant changes after interfering THUMPD1 by siRNA. (B) When a proteasome inhibitor (10  $\mu$ M MG132) is added to the culture medium, the effects of transfection on the expression of Snail are diminished or abolished, and there is a corresponding decrease in E-cadherin. (C). The key signaling proteins involved in stabilizing Snail had no obvious changes by regulating THUMPD1.
